# Supplementary material for: Characterizing the Influence of a Heterotrophic Bicosoecid Flagellate Pseudobodo sp. on the Dinoflagellate Gambierdiscus balechii
Source: MDPI journal article supplement (doi:10.3390/toxins15110657), 2023-11-14
Supplement: s1 [file s1]

## Article

# Characterizing the Influence of a Heterotrophic Bicosoecid Flagellate *Pseudobodo* sp. on the Dinoflagellate *Gambierdiscus balechii*

**Table S1.** Total algal cell number in each group.

| Groups      | Control groups     |                    |                    | Infected groups    |                    |                    |
|-------------|--------------------|--------------------|--------------------|--------------------|--------------------|--------------------|
|             | A1                 | A2                 | A3                 | B1                 | B2                 | B3                 |
| Cell Number | $6.52 \times 10^5$ | $6.00 \times 10^5$ | $5.93 \times 10^5$ | $3.08 \times 10^5$ | $2.38 \times 10^5$ | $2.42 \times 10^5$ |

**Table S2.** Cellular production of individual toxins in the control and infected group.

| Observed<br><i>m/z</i> | Retention<br>time (min) | Peak area (mean $\pm$ SD) |                    | Significant<br>difference |
|------------------------|-------------------------|---------------------------|--------------------|---------------------------|
|                        |                         | Control group             | Infected group     |                           |
| 1039.5041              | 6.55                    | $278.19 \pm 33.50$        | $172.54 \pm 10.00$ | $p < 0.05$                |
| 1041.5166              | 6.28                    | $214.02 \pm 30.77$        | $145.17 \pm 8.89$  | $p < 0.05$                |
| 1021.4921              | 6.57                    | $47.52 \pm 3.71$          | $24.76 \pm 2.38$   | $p < 0.05$                |
| 1023.5066              | 6.28                    | $48.74 \pm 5.29$          | $29.57 \pm 3.99$   | $p < 0.05$                |
| 926.4497               | 3.65                    | $57.37 \pm 3.94$          | $35.37 \pm 2.03$   | $p < 0.05$                |
| 980.5669               | 5.61                    | $61.09 \pm 9.15$          | $38.71 \pm 0.80$   | $p < 0.05$                |
| 990.5030               | 3.96                    | $30.09 \pm 4.06$          | $19.10 \pm 1.89$   | $p < 0.05$                |
| 943.5472               | 6.28                    | $34.40 \pm 2.78$          | $20.79 \pm 1.39$   | $p < 0.05$                |
| 944.4608               | 3.67                    | $23.97 \pm 2.57$          | $15.07 \pm 1.06$   | $p < 0.05$                |
| 958.4905               | 5.20                    | $96.47 \pm 27.09$         | $52.00 \pm 0.26$   | $p > 0.05$                |
| 1154.5658              | 6.21                    | $65.80 \pm 23.04$         | $26.30 \pm 0.35$   | $p > 0.05$                |
| 1060.5256              | 4.86                    | $19.52 \pm 3.40$          | $13.99 \pm 2.48$   | $p > 0.05$                |
| 1042.5164              | 5.47                    | $14.99 \pm 2.43$          | $11.20 \pm 0.03$   | $p > 0.05$                |
| 1171.5919              | 6.21                    | $18.51 \pm 7.09$          | $8.23 \pm 0.64$    | $p > 0.05$                |
| 1001.7577              | 6.42                    | $50.74 \pm 13.13$         | $76.03 \pm 3.87$   | $p < 0.05$                |
| 1019.7697              | 6.40                    | $86.27 \pm 22.50$         | $135.74 \pm 5.80$  | $p < 0.05$                |
| 1036.7966              | 6.42                    | $12.48 \pm 3.17$          | $20.94 \pm 0.79$   | $p < 0.05$                |
| 1063.5001              | 6.25                    | $15.78 \pm 1.96$          | $11.60 \pm 1.16$   | $p < 0.05$                |
| 983.7480               | 6.41                    | $40.41 \pm 10.42$         | $61.28 \pm 3.58$   | $p < 0.05$                |

|           |       |                 |                |            |
|-----------|-------|-----------------|----------------|------------|
| 947.7255  | 21.67 | 13.80 ± 3.52    | 0.22 ± 0.38    | $p < 0.05$ |
| 996.7793  | 21.70 | 9.48 ± 2.21     | ND             | $p < 0.05$ |
| 1415.0502 | 28.11 | 59.21 ± 3.64    | 37.78 ± 10.55  | $p < 0.05$ |
| 939.7218  | 30.41 | 81.46 ± 8.07    | 117.89 ± 12.10 | $p < 0.05$ |
| 1072.7972 | 31.76 | 602.14 ± 126.88 | 834.62 ± 69.50 | $p < 0.05$ |
| 1092.8602 | 7.77  | 11.59 ± 2.57    | 9.26 ± 0.75    | $p > 0.05$ |
| 1076.8276 | 6.88  | 67.25 ± 17.12   | 51.62 ± 12.01  | $p > 0.05$ |
| 1075.8319 | 7.81  | 49.51 ± 11.33   | 40.81 ± 2.43   | $p > 0.05$ |
| 1080.8220 | 6.15  | 26.47 ± 3.99    | 32.70 ± 3.28   | $p > 0.05$ |
| 1057.8229 | 7.72  | 51.63 ± 12.74   | 39.56 ± 2.35   | $p > 0.05$ |
| 1027.7753 | 6.72  | 322.48 ± 82.79  | 311.38 ± 29.06 | $p > 0.05$ |
| 1041.7906 | 6.95  | 173.89 ± 42.88  | 128.86 ± 15.02 | $p > 0.05$ |
| 1059.8024 | 6.90  | 54.38 ± 14.35   | 38.77 ± 5.10   | $p > 0.05$ |
| 1045.7870 | 6.07  | 181.25 ± 41.68  | 187.34 ± 13.76 | $p > 0.05$ |
| 1029.7904 | 7.20  | 278.78 ± 78.96  | 316.37 ± 20.35 | $p > 0.05$ |
| 1047.8019 | 7.22  | 163.27 ± 49.55  | 198.66 ± 17.04 | $p > 0.05$ |
| 1064.8277 | 7.29  | 143.25 ± 44.94  | 177.59 ± 15.86 | $p > 0.05$ |
| 895.6585  | 26.38 | 63.86 ± 5.34    | 58.64 ± 10.08  | $p > 0.05$ |
| 953.6993  | 25.09 | 13.26 ± 2.55    | 17.43 ± 2.37   | $p > 0.05$ |
| 1055.7699 | 31.75 | 585.22 ± 95.01  | 703.84 ± 80.58 | $p > 0.05$ |
| 1069.7499 | 26.39 | 91.60 ± 4.04    | 86.80 ± 20.55  | $p > 0.05$ |
| 1086.7762 | 26.30 | 94.97 ± 6.53    | 98.63 ± 24.83  | $p > 0.05$ |
| 543.8892  | 26.36 | 308.10 ± 20.12  | 287.73 ± 48.96 | $p > 0.05$ |

Note: ND = not detected.

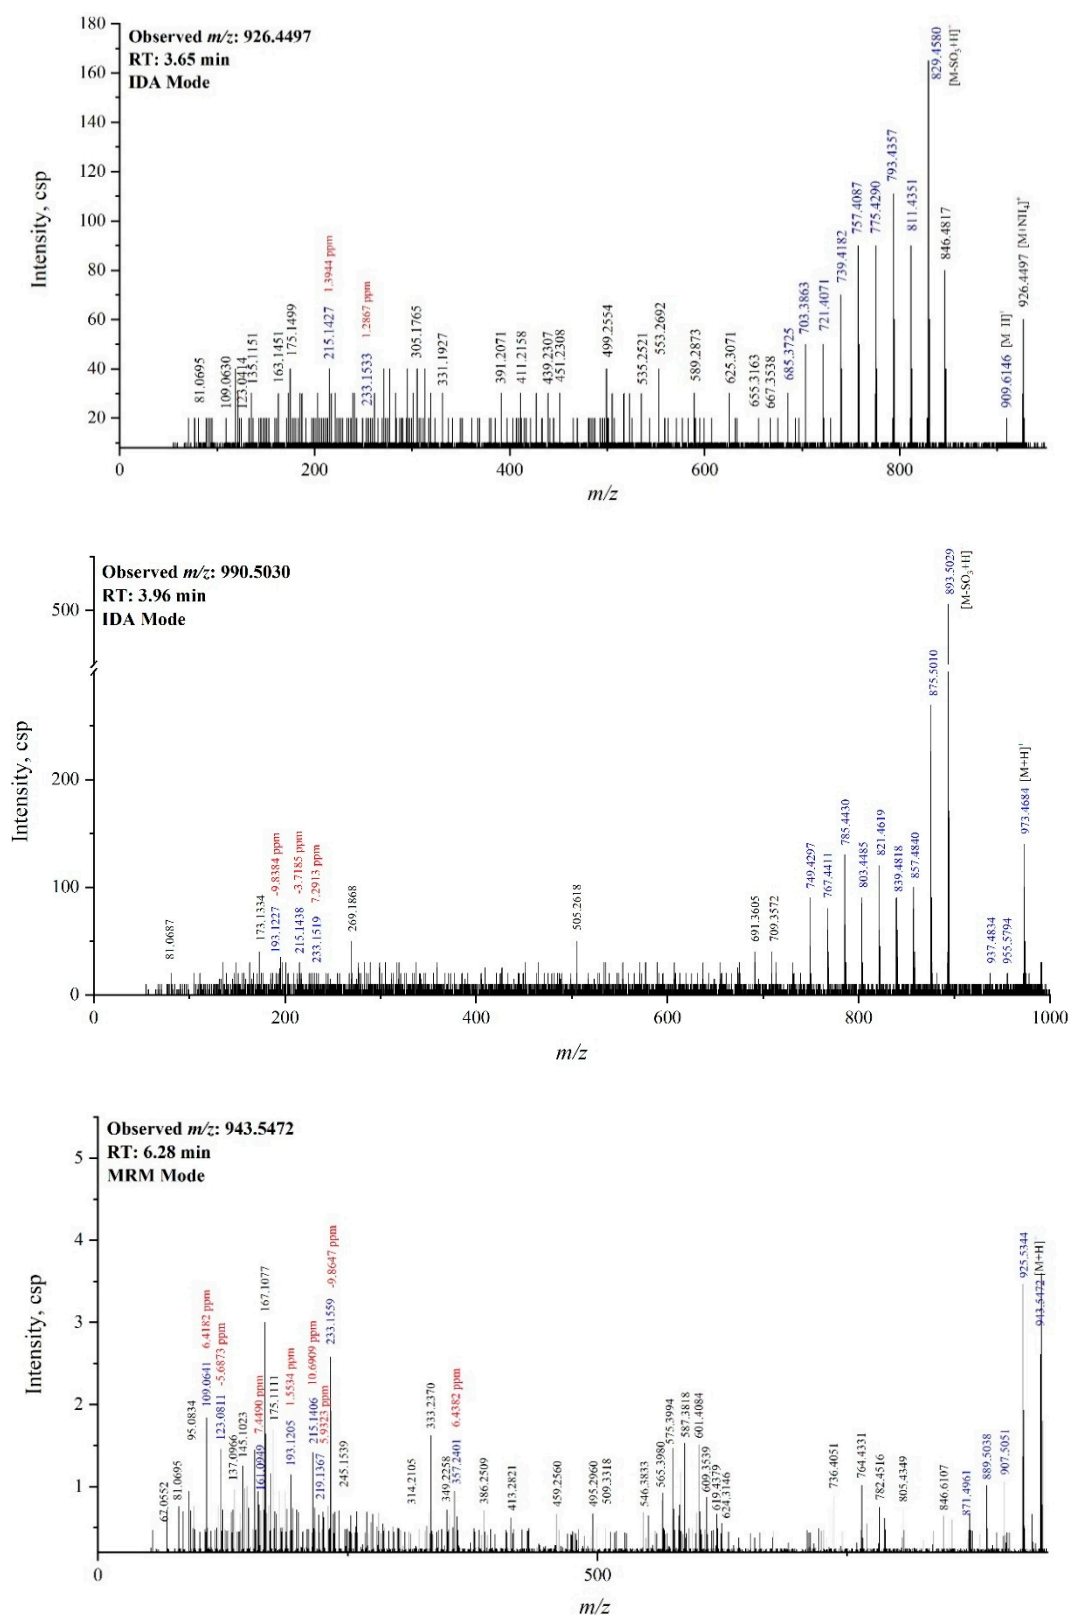

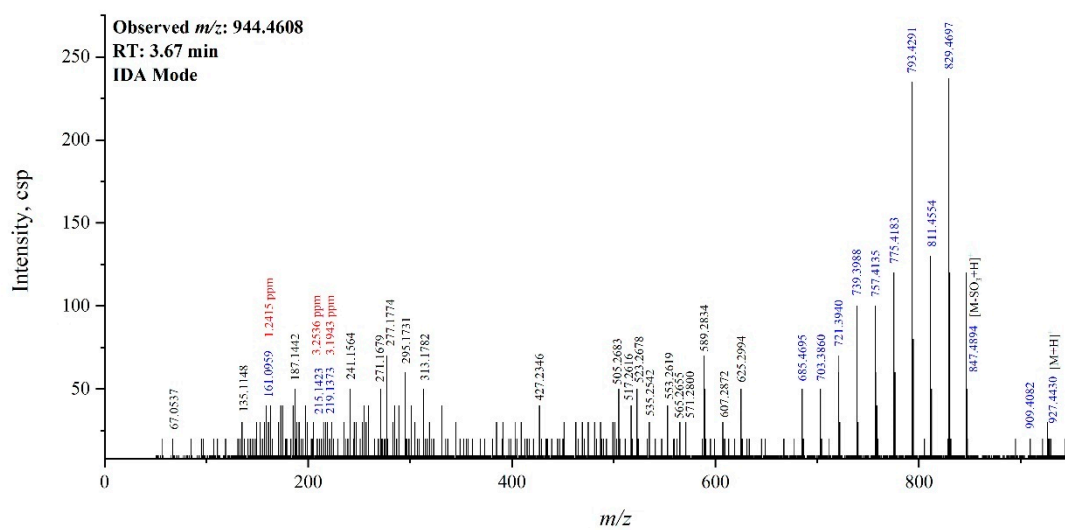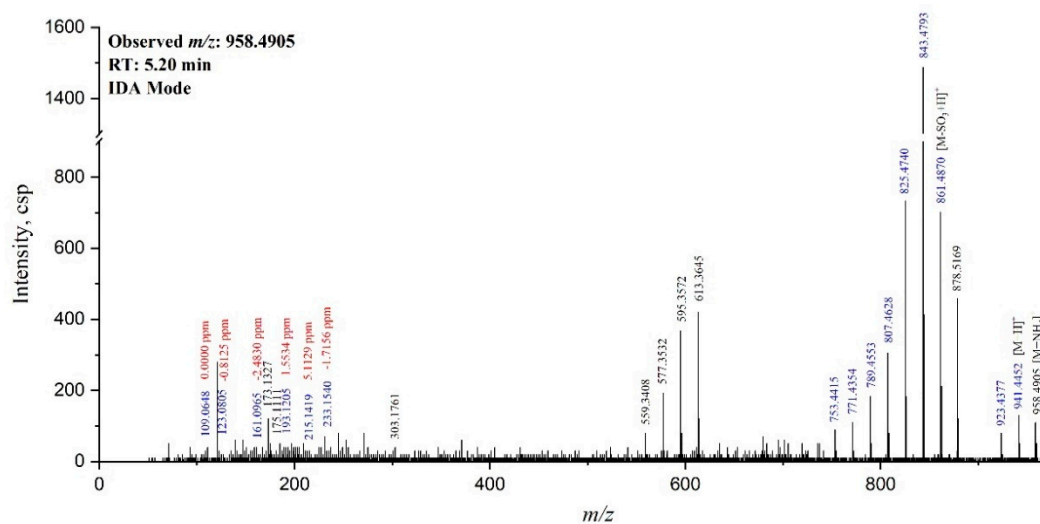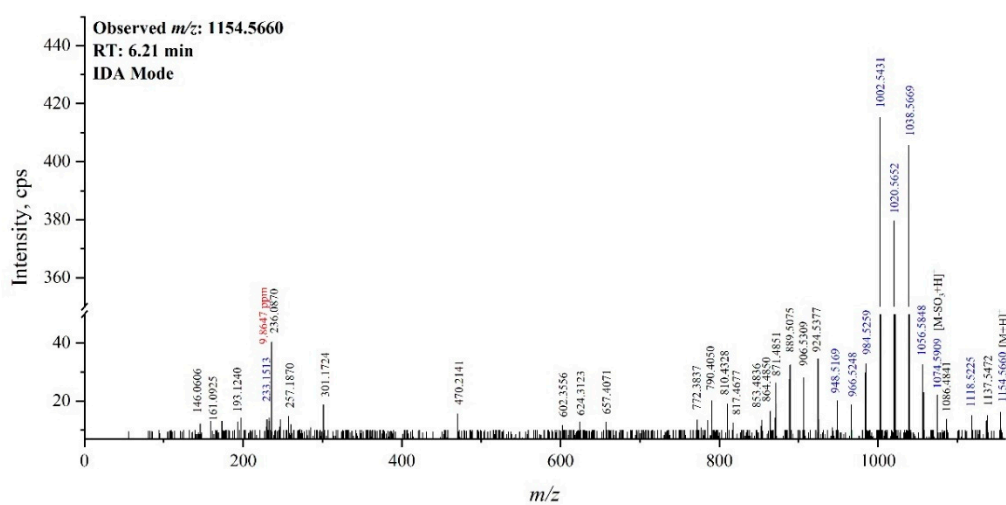

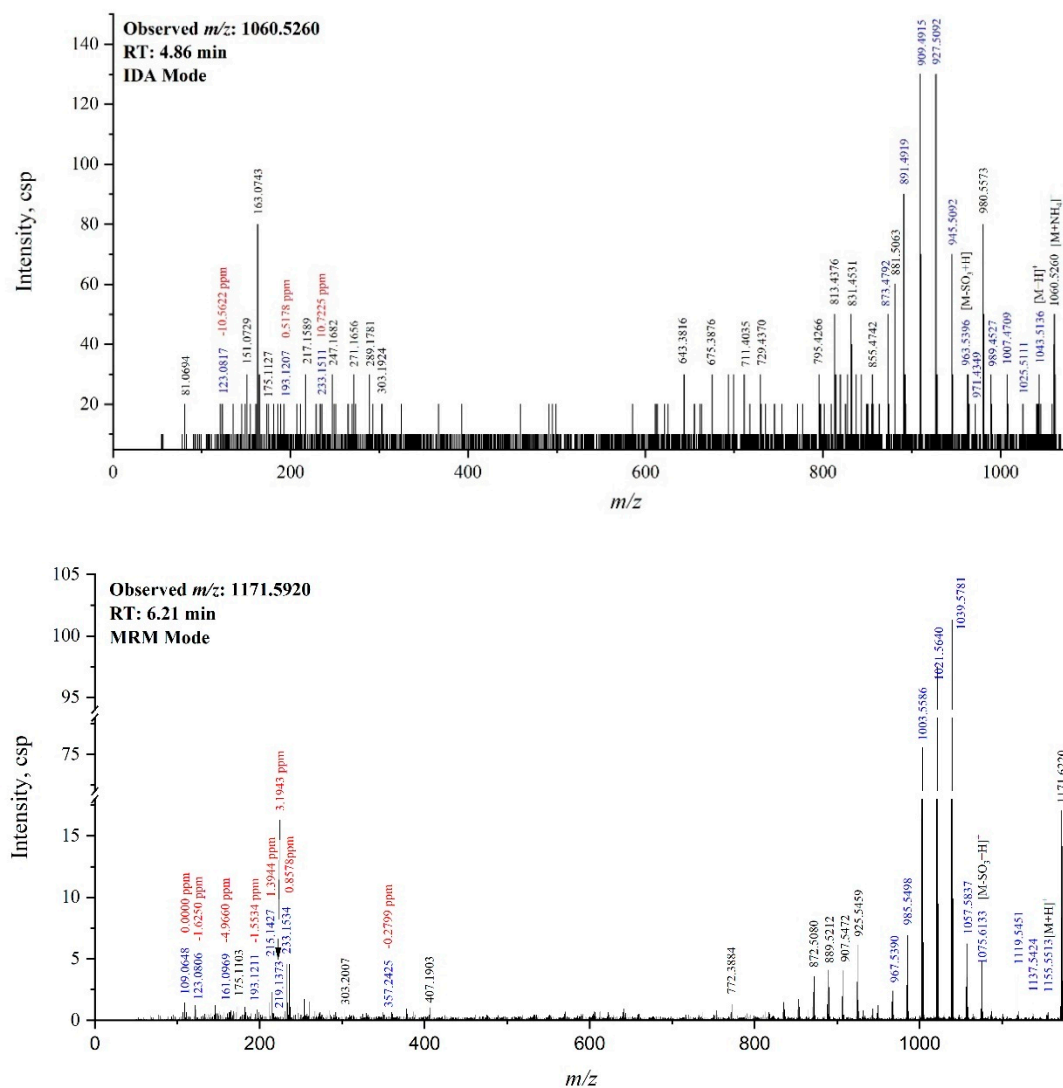

**Figure S1.** MS/MS spectra of gambierone analogues. The specific neutral losses and fragments of gambierones were shown in blue, and mass errors of specific fragments were shown in red.

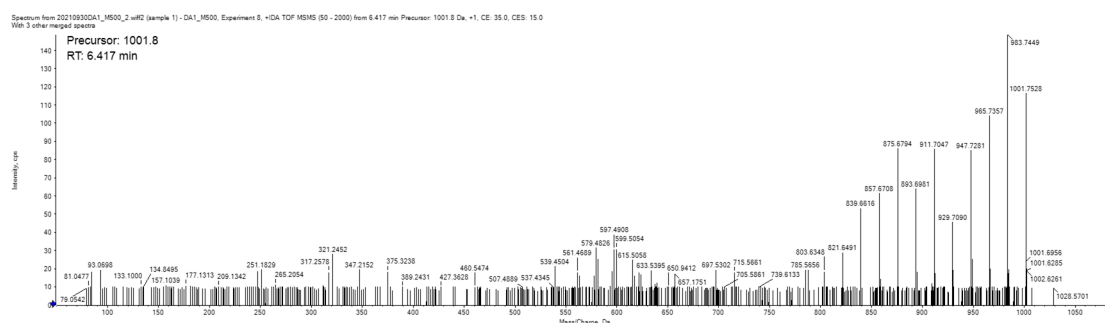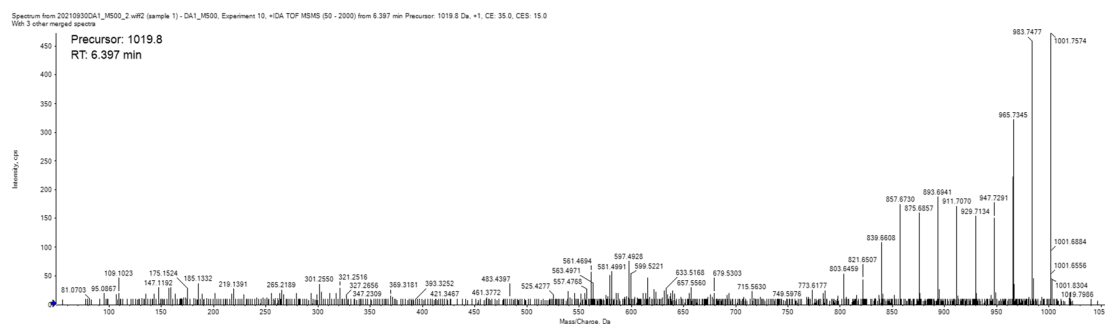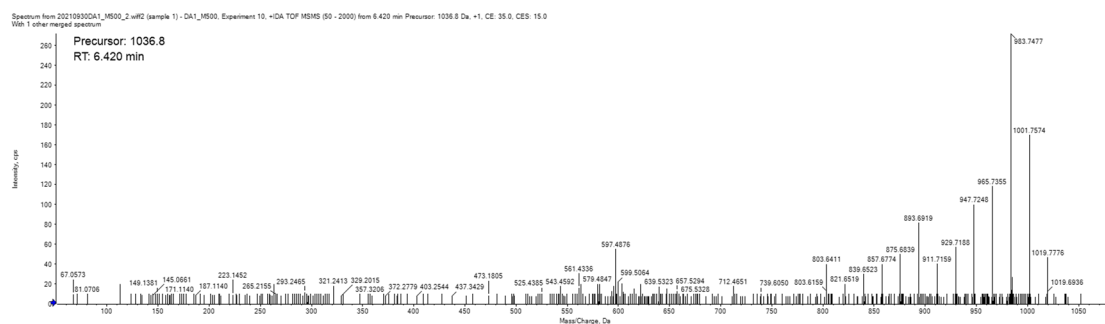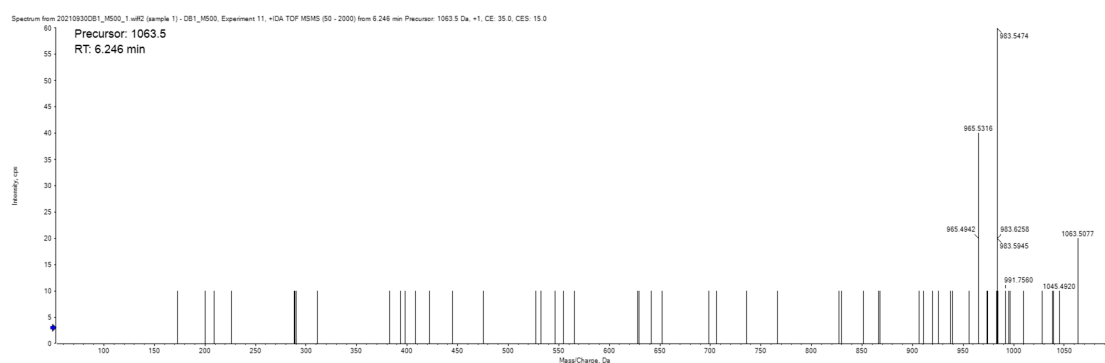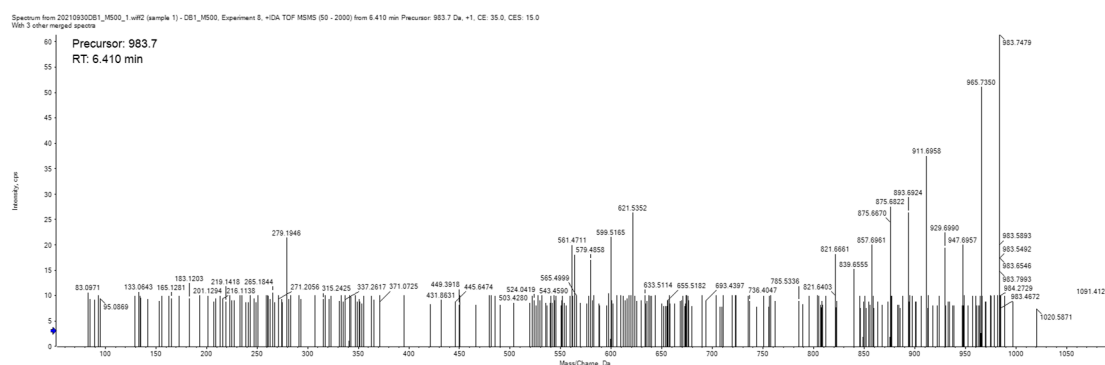

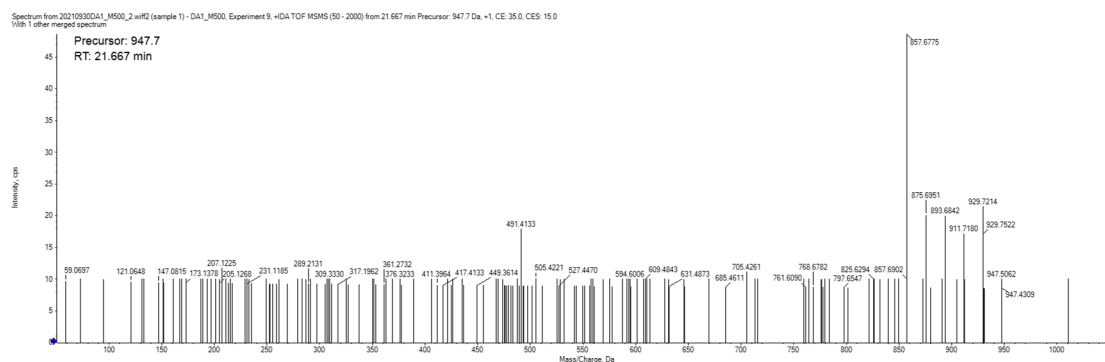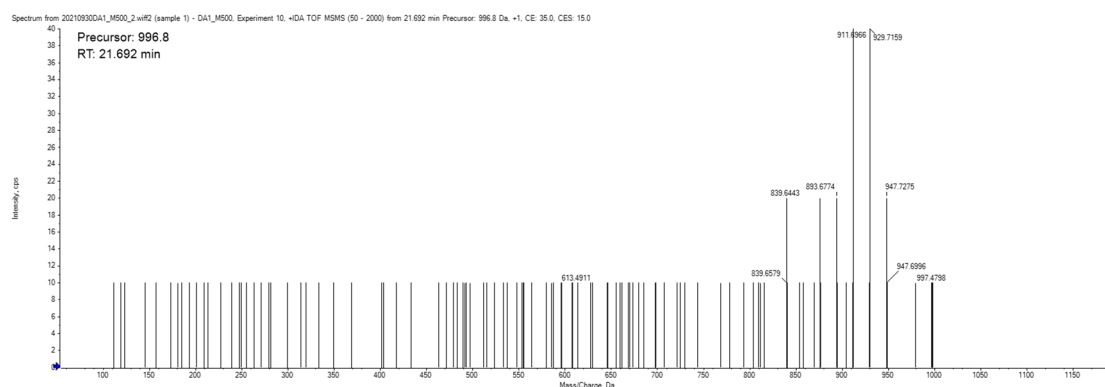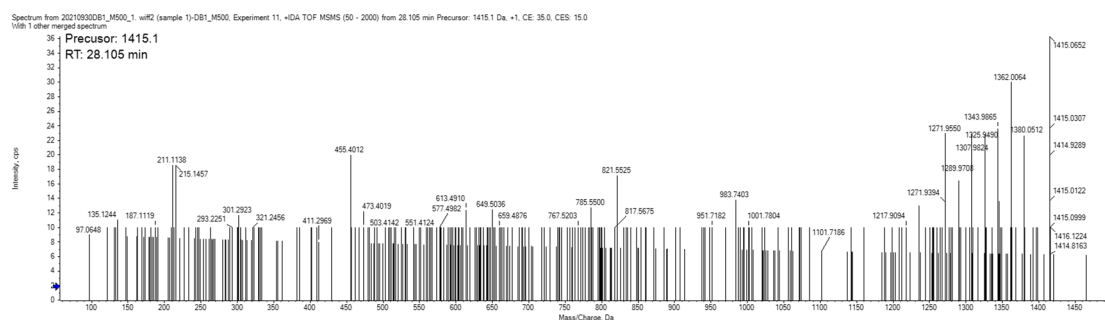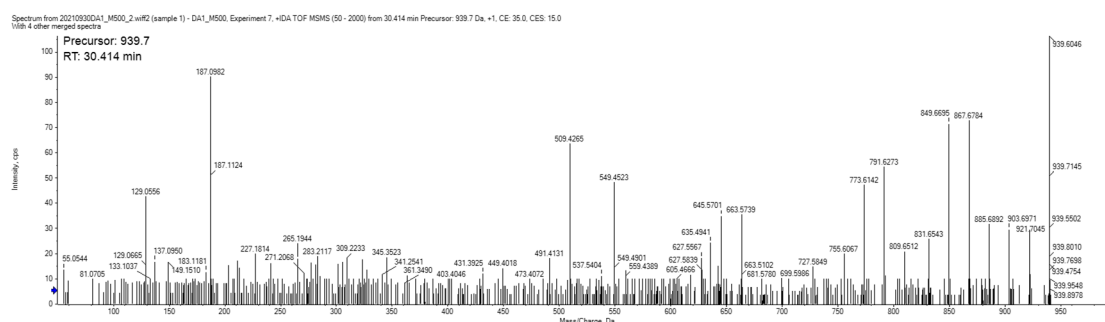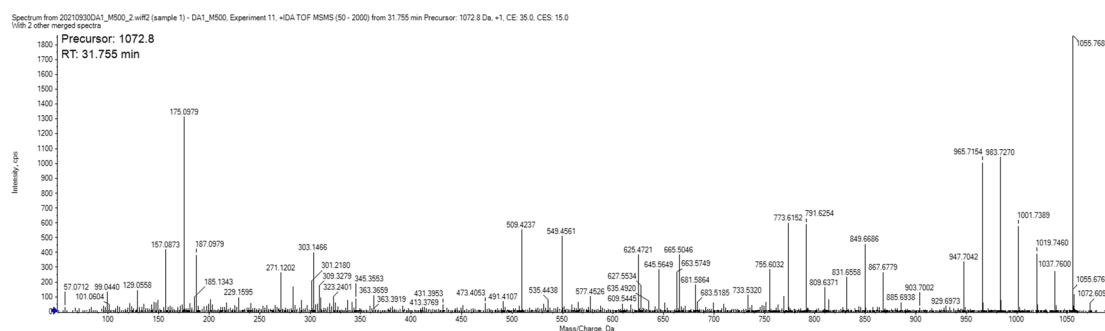

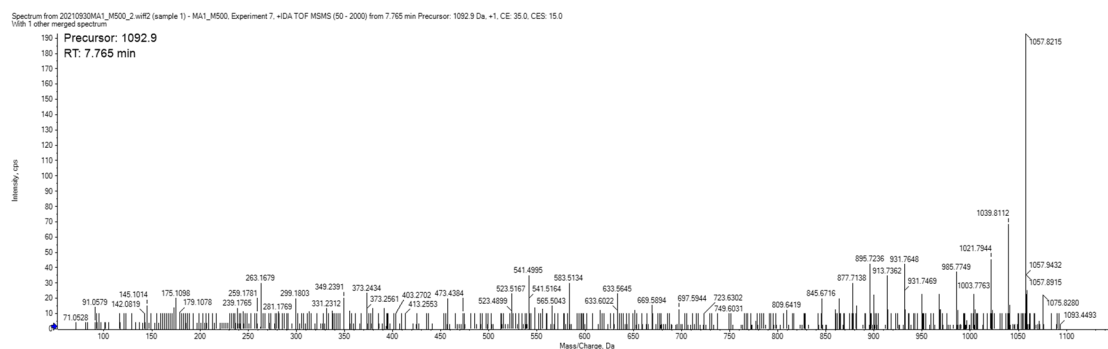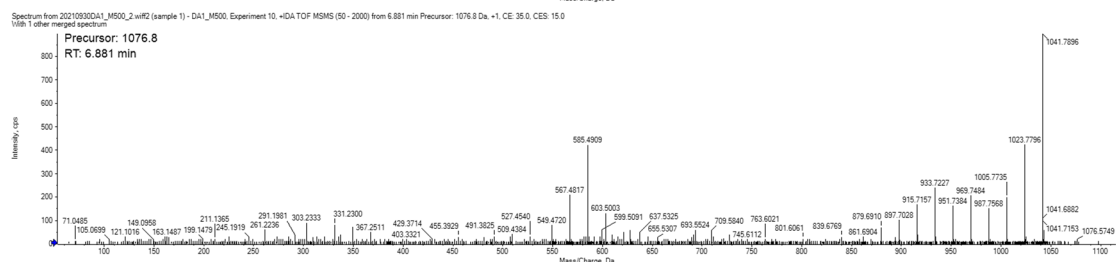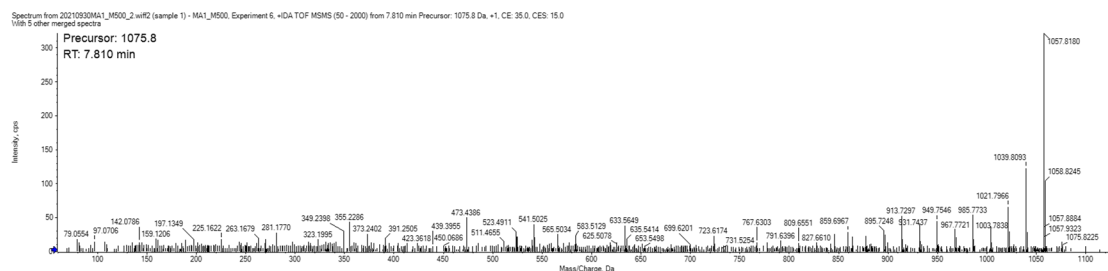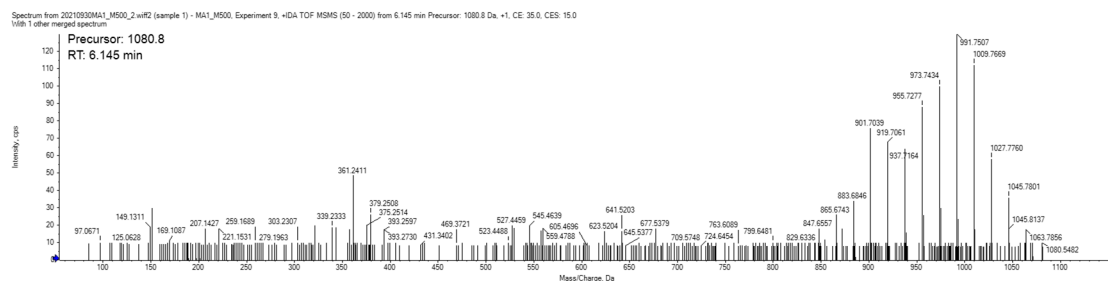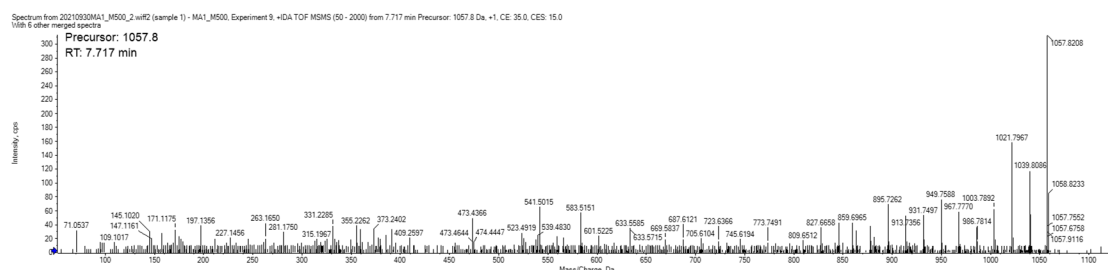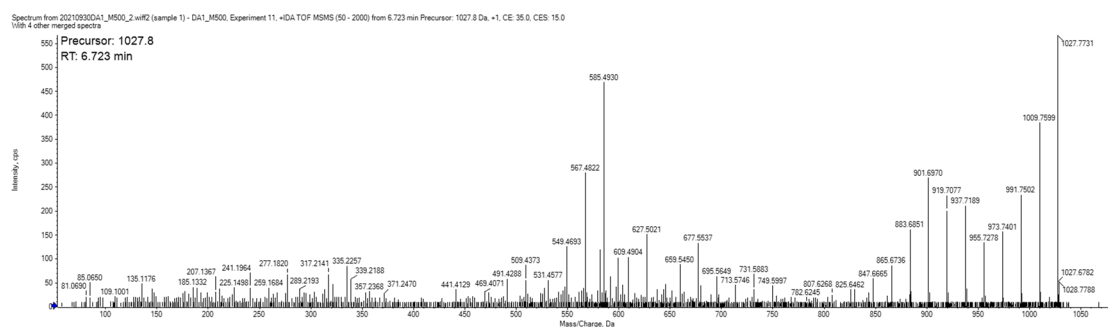

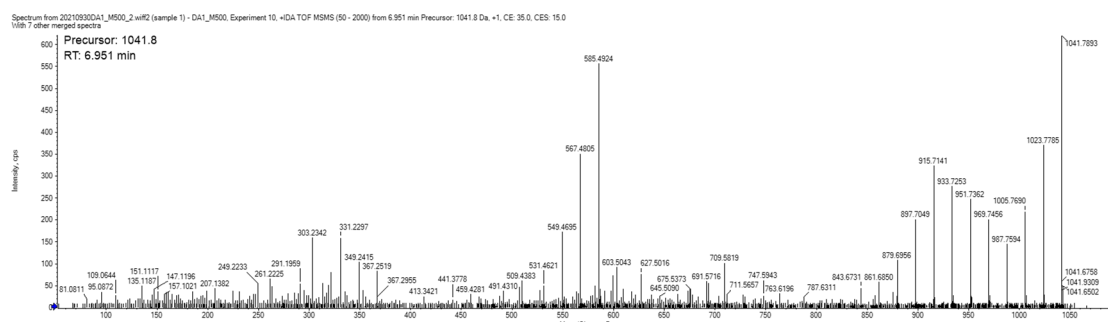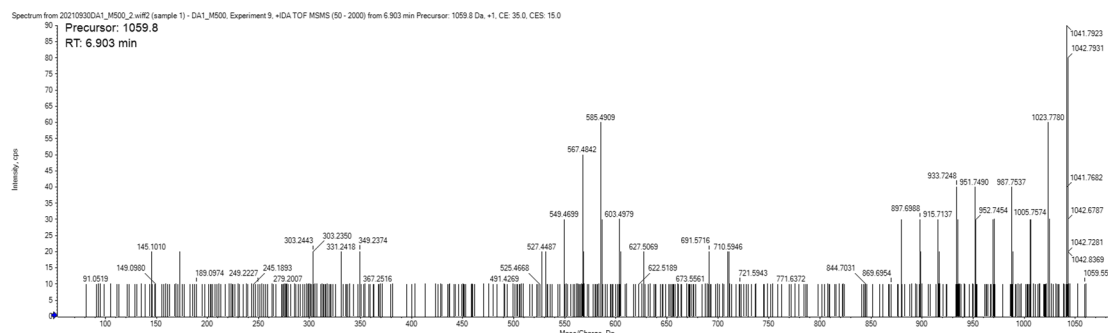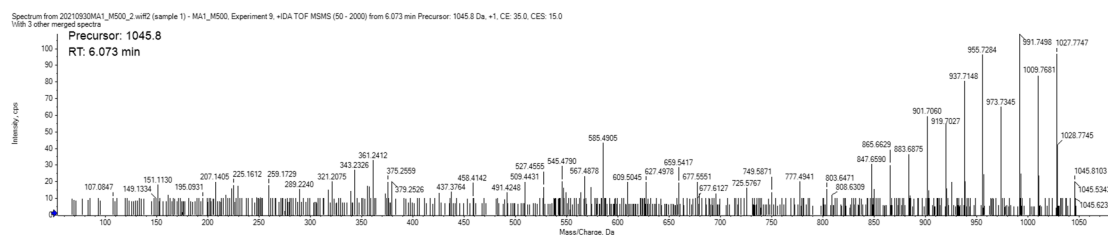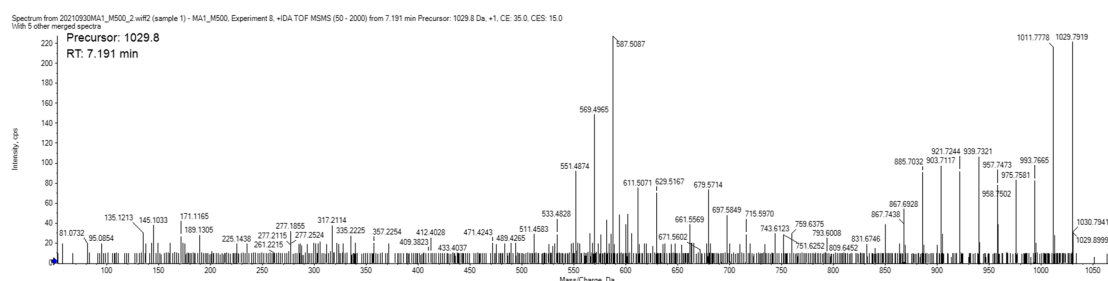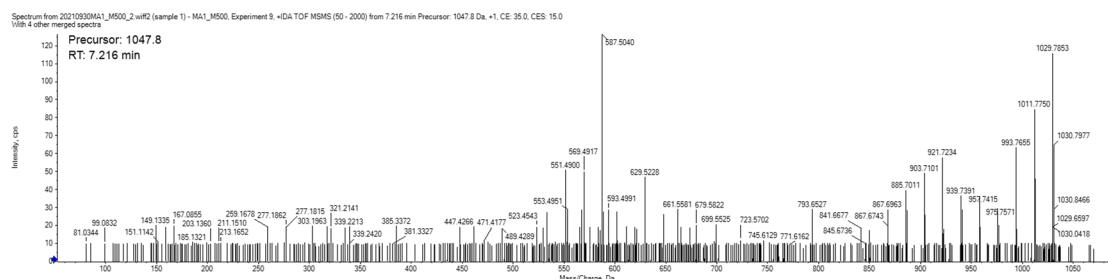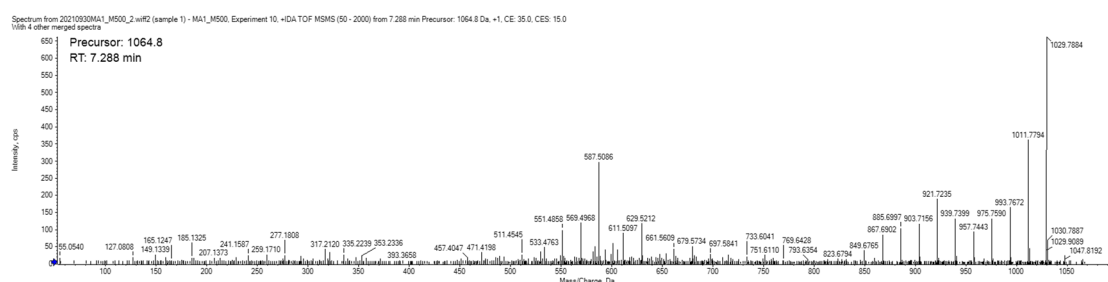

Spectrum from 20210930DA7\_M500\_1\_wtR2 (sample 1) - DA7\_M500, Experiment 8, +IDA TOF MSMS (50 - 2000) from 26.377 min Precursor: 895.7 Da, +1, CE: 35.0, CES: 15.0  
Vs: 4 other merged spectra

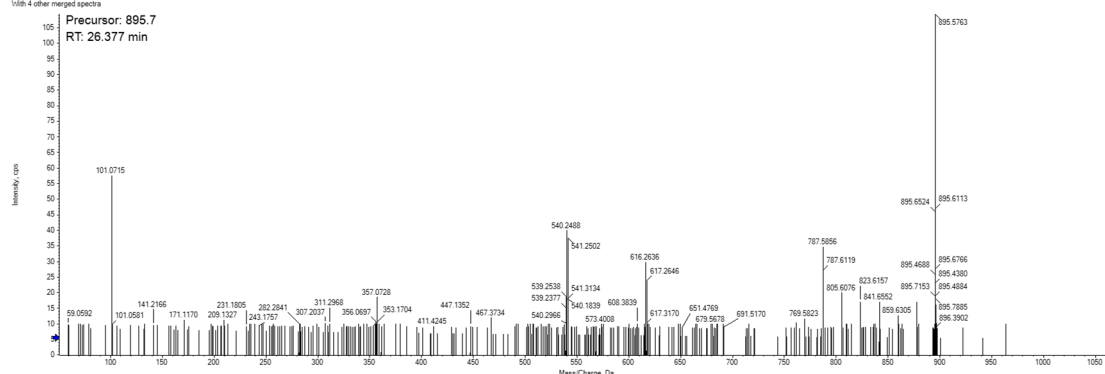

Spectrum from 20210930DA7\_M500\_1\_wtR2 (sample 1) - DA7\_M500, Experiment 11, +IDA TOF MSMS (50 - 2000) from 25.089 min Precursor: 953.7 Da, +1, CE: 35.0, CES: 15.0  
Vs: 4 other merged spectra

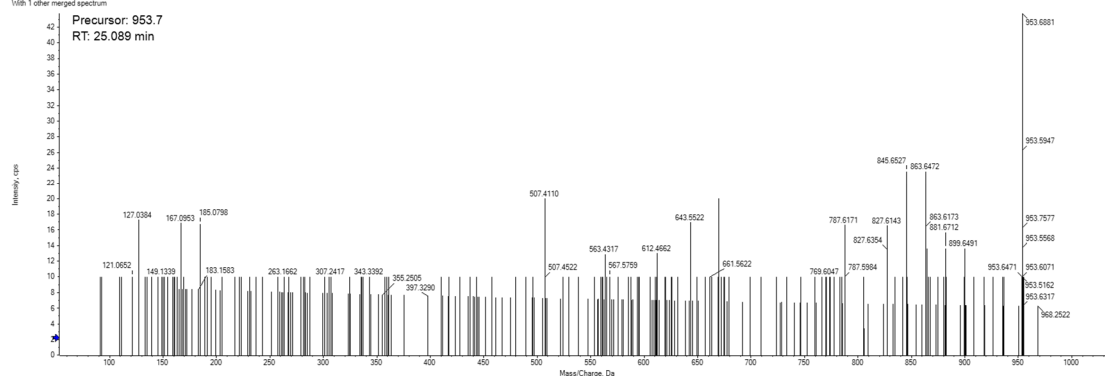

Spectrum from 20210930DA1\_M500\_2\_wtR2 (sample 1) - DA1\_M500, Experiment 10, +IDA TOF MSMS (50 - 2000) from 31.753 min Precursor: 1055.8 Da, +1, CE: 35.0, CES: 15.0  
Vs: 2 other merged spectra

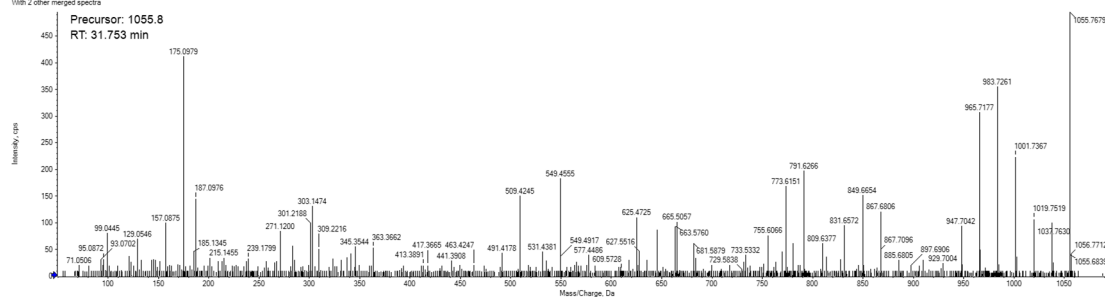

Spectrum from 20210930DA1\_M500\_2\_wtR2 (sample 1) - DA1\_M500, Experiment 10, +IDA TOF MSMS (50 - 2000) from 26.389 min Precursor: 1069.7 Da, +1, CE: 35.0, CES: 15.0  
Vs: 4 other merged spectra

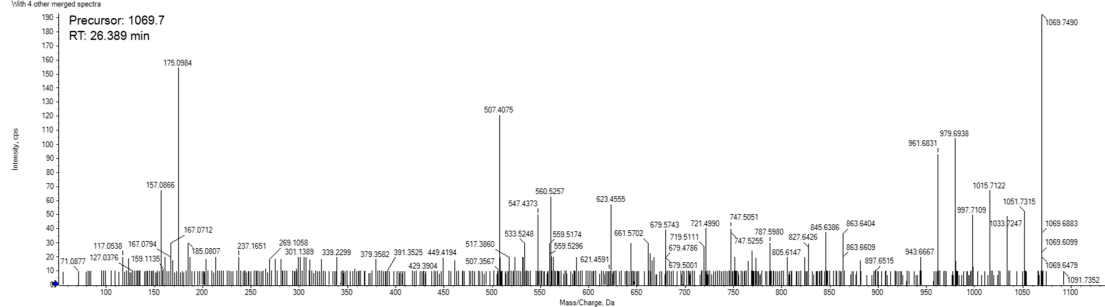

Spectrum from 20210930DA1\_M500\_2\_wtR2 (sample 1) - DA1\_M500, Experiment 11, +IDA TOF MSMS (50 - 2000) from 26.296 min Precursor: 1086.8 Da, +1, CE: 35.0, CES: 15.0  
Vs: 4 other merged spectra

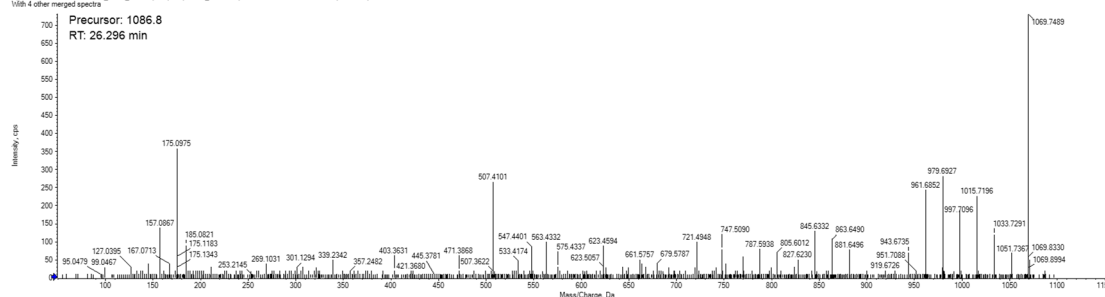

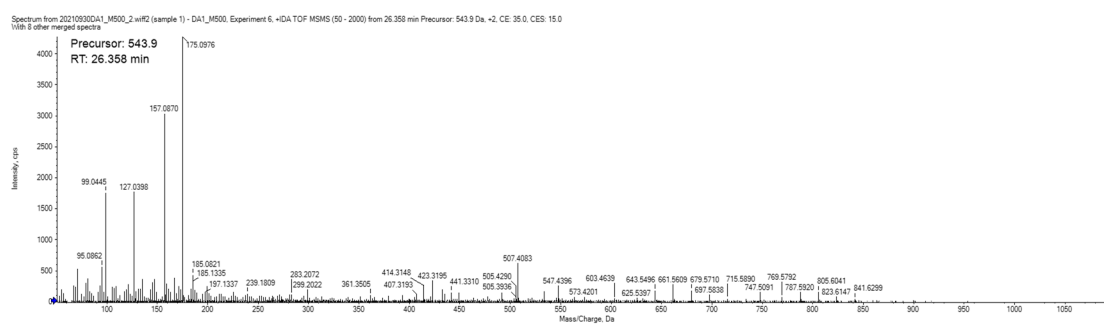

**Figure S2.** MS/MS spectra of polyol-polyene super-carbon-chain compounds.
